# Supplementary material
Source: PubMed Central journal article supplement (PMC4761649)
Supplement: NIHMS736259-supplement-supplemental.pdf [file NIHMS736259-supplement-supplemental.pdf]

## SUPPLEMENTAL INFORMATION

### **Collaborative Enhancement of Endothelial Targeting of Nanocarriers by Modulating Platelet Endothelial Cell Adhesion Molecule-1/CD31 Epitope Engagement**

Ann-Marie Chacko,<sup>1,2,§</sup> Jingyan Han,<sup>3,§</sup> Colin F. Greineder,<sup>3</sup> Blaine J. Zern,<sup>3</sup> John L. Mikitsh,<sup>1</sup> Madhura Nayak,<sup>1</sup> Divya Menon,<sup>3</sup> Ian H. Johnston,<sup>3</sup> Mortimer Poncz,<sup>6</sup> David M. Eckmann,<sup>4</sup> Peter F. Davies<sup>5</sup> and Vladimir R. Muzykantov<sup>2,3\*</sup>

<sup>1</sup>Department of Radiology, Division of Nuclear Medicine and Clinical Molecular Imaging, <sup>2</sup>Center for Targeted Therapeutics and Translational Nanomedicine, Institute for Translational Medicine and Therapeutics, <sup>3</sup>Department of Systems Pharmacology and Translational Therapeutics, <sup>4</sup>Department of Anesthesiology & Critical Care, <sup>5</sup>Department of Pathology and Institute for Medicine and Engineering, Perelman School of Medicine, University of Pennsylvania, Philadelphia, PA, United States, and <sup>6</sup>Department of Pediatrics, Division of Hematology, The Children's Hospital of Philadelphia, Philadelphia, PA, United States

<sup>§</sup>Authors contributed equally to this work; \*Address correspondence to muzykant@mail.med.upenn.edu

**Table S1.<sup>a</sup> Binding Epitopes and Parameters of Radioiodinated anti-PECAM Ab to Live Endothelial Cells (EC)**

| Ab               | Species Reactivity | clone | Amino Acid (AA) Epitope Mapping, Ig Domain (IgD) | PECAM                    |                                            | Effect on PECAM Homophilic Adhesion |
|------------------|--------------------|-------|--------------------------------------------------|--------------------------|--------------------------------------------|-------------------------------------|
|                  |                    |       |                                                  | K <sub>d</sub> (nM)      | B <sub>max</sub> (10 <sup>5</sup> Ab/cell) |                                     |
| Ab <sub>1h</sub> | Human              | 62    | AA26-AA30, IgD1                                  | 4.32 ± 0.30 <sup>b</sup> | 2.62 ± 0.26 <sup>b</sup>                   | Inhibit                             |
| Ab <sub>2h</sub> | Human              | 37    | AA42-AA45, IgD1                                  | 0.24 ± 0.02 <sup>b</sup> | 1.51 ± 0.12 <sup>b</sup>                   | No effect                           |
| Ab <sub>1m</sub> | Mouse              | MEC13 | AA164-AA177, IgD2                                | 2.81 ± 0.13 <sup>c</sup> | 5.81 ± 0.2 <sup>c</sup>                    | No effect                           |
| Ab <sub>2m</sub> | Mouse              | 390   | AA194-AA205, IgD2                                | 0.25 ± 0.01 <sup>c</sup> | 2.60 ± 0.06 <sup>c</sup>                   | Inhibit                             |

<sup>a</sup>Ref.<sup>1</sup>

<sup>b</sup>Ab binding to native huPECAM on HUVEC

<sup>c</sup>Ab binding to native muPECAM on murine MS1 cells

**Table S2.<sup>a</sup> Lung:Blood Tissue Selectivity Summary**

| Formulation                            | Localization Ratio |           |                   |
|----------------------------------------|--------------------|-----------|-------------------|
|                                        | IgG                | Paired Ab | Specificity Index |
| <sup>125</sup> I-Ab <sub>1m</sub>      | 2.98               | 10.22     | 3.4               |
| <sup>125</sup> I-Ab <sub>2m</sub>      | 2.40               | 7.75      | 3.2               |
| Ab <sub>1m</sub> / <sup>125</sup> I-NC | 17.55              | 183.58    | 10.5              |
| Ab <sub>2m</sub> / <sup>125</sup> I-NC | 62.42              | 238.75    | 3.8               |

<sup>a</sup>Mice were injected intravenously with IgG or paired Ab (at t=-30 min), followed by radiolabeled probe (anti-PECAM <sup>125</sup>I-Ab or <sup>125</sup>I-NC) (at t=0 min). Tissues were harvested at t=30 min. Specificity Index denotes the relative lung: blood localization ratio of paired Ab group to IgG control group.

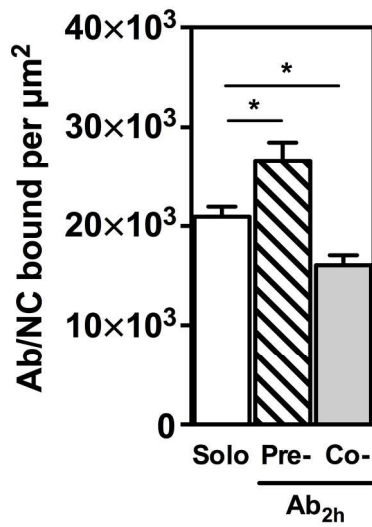

**Figure S1. Free paired  $\text{Ab}_{2h}$  pre-incubation specifically enhances EC binding of  $\text{Ab}_{1h}/\text{NCs}$ .** EC binding of  $\text{Ab}_{1h}/\text{NC}$  at high Ab density over particle surface ( $200 \text{ Ab}/\text{NC}$ ) was enhanced by paired free  $\text{Ab}_{2h}$  when pre-incubated with cells (hashed bar) than when cells were co-incubated with paired Ab and  $\text{Ab}_{1h}/\text{NC}$  (grey bar) when compared to solo binding (open bar). The number of total EC bound fluorescent particles in each image field as quantified by fluorescence microscopy. Data are mean  $\pm$  SE (n=8).

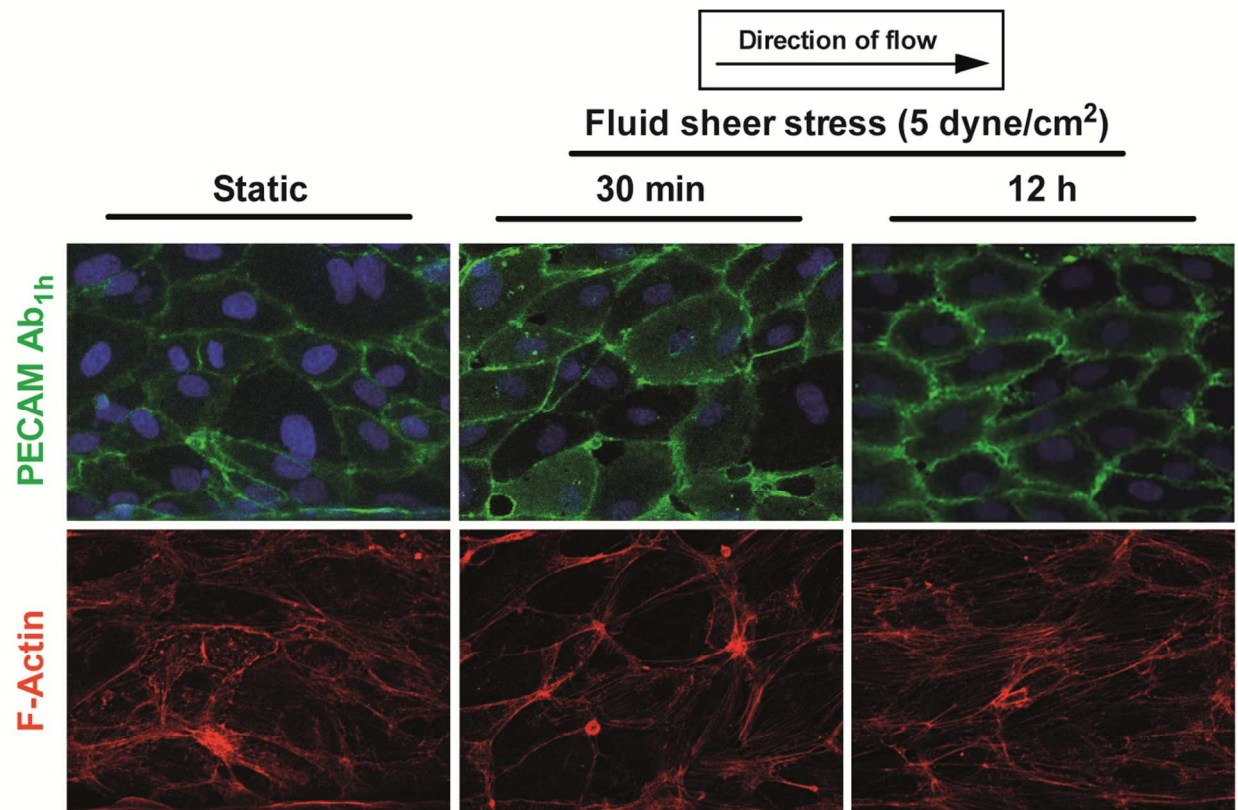

**Figure S2. Distribution of PECAM and F-actin with and without exposure to flow.** Confluent monolayers of HUVEC were exposed to static conditions, short-term (30 min) acute flow, or overnight (12 h) flow adaption and subsequently fixed, permeabilized, and stained for PECAM (green) and F-actin (red). In contrast to F-actin, PECAM staining demonstrates neither a change in intensity nor distribution, with PEMCAM remaining predominantly at the cell-cell junctions.

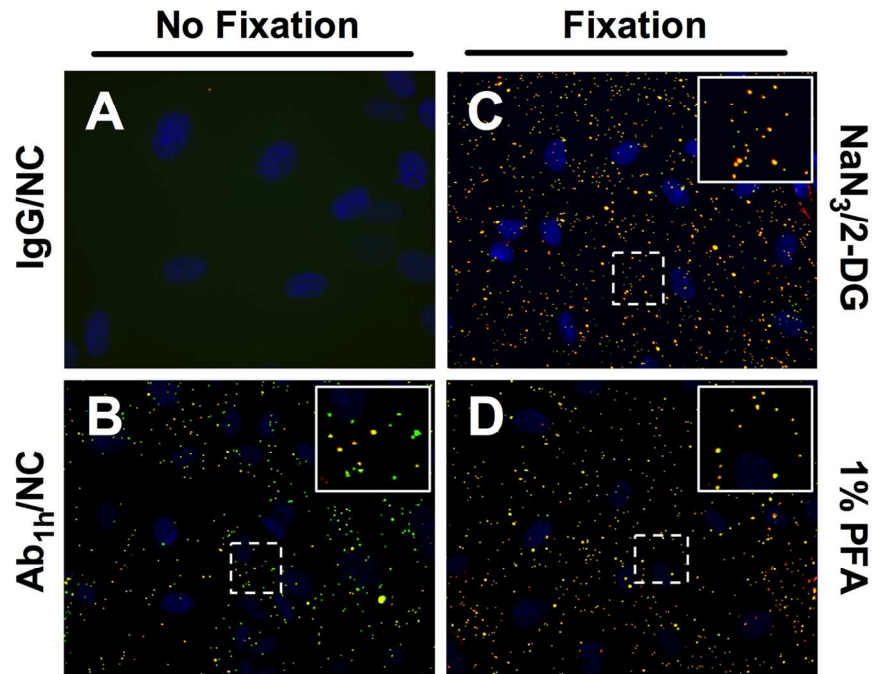

**Figure S3.** Microscopy studies reveal no internalization of fully coated Ab<sub>1h</sub>/NC in fixed ECs *versus* live ATP-depleted ECs under fluid shear stress (4 dyne/cm<sup>2</sup>) following counterstain with secondary red anti-IgG. Merged fluorescence images show internalized (green) and surface-bound (yellow) Ab/NC, with DAPI-stained nuclei (blue). (A) Control IgG/NC have negligible surface binding, whereas Ab<sub>1h</sub>/NC undergo endocytosis under flow (B). (C) Endocytosis of Ab<sub>1h</sub>/NC was blocked in ATP-depleted EC treated with NaN<sub>3</sub>/2-DG (5 mM, 30 min) as well as with (D) EC pre-fixed with PFA (1%, 10 min). Inset in each panel is close up of selected field.

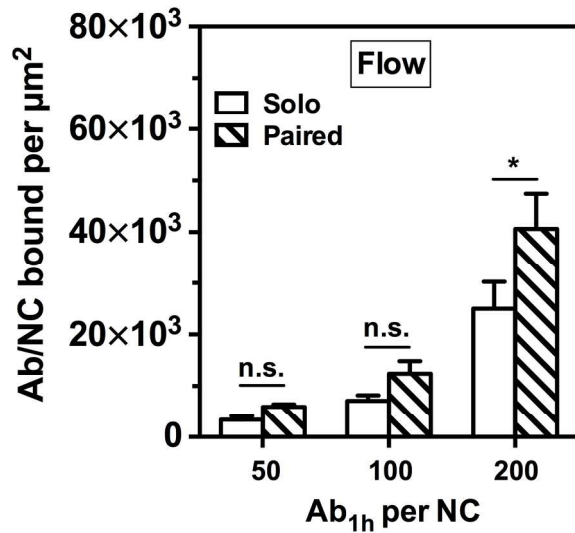

**Figure S4.** Under flow conditions (4 dyne/cm<sup>2</sup>), pre-incubation of paired Ab<sub>2h</sub> (20 nM) stimulated endothelial binding of Ab<sub>1h</sub>/NCs with different targeted antibody density on particle surface (*i.e.*, # Ab per particle) as compared to pre-incubation with solo control IgG. The number of total EC bound fluorescent particles in each image field as quantified by fluorescence microscopy. Data are shown as mean ± SE (n=8). \*,  $P < 0.05$ ; \*\*\*,  $P < 0.001$ ; n.s.,  $P > 0.05$ . Open bars show NC binding with solo treatment; hashed bars show NC binding with paired free Ab treatment.

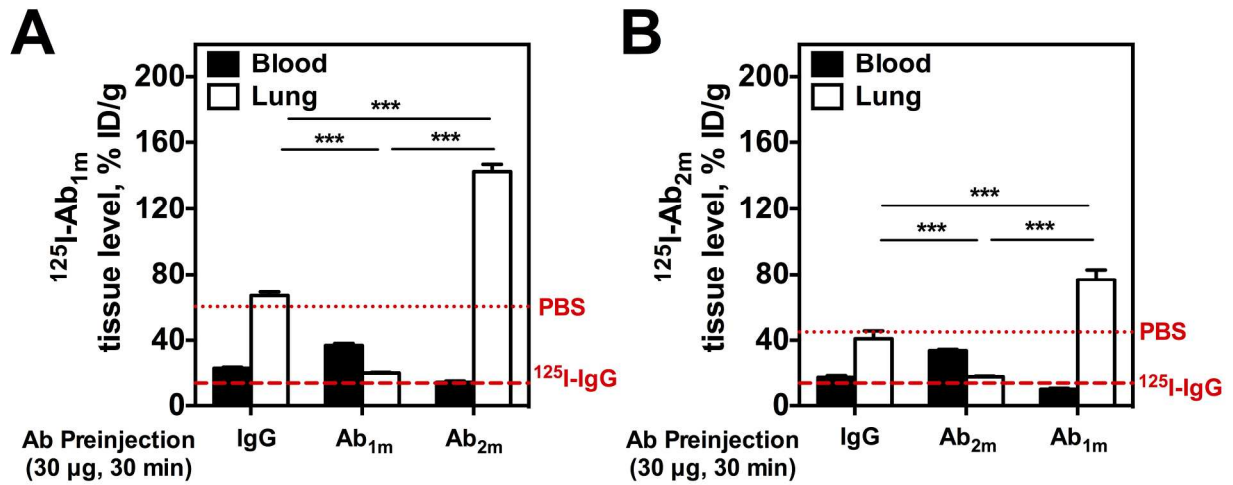

**Figure S5. *In vivo* endothelial targeting of  $\text{Ab}/^{125}\text{I-NC}$  to  $\mu\text{PECAM}$  is enhanced by paired  $\mu\text{PECAM}$  Ab.** (A) Lung tissue radioactivity levels at 30 min p.i. of anti- $\mu\text{PECAM}$   $^{125}\text{I-Ab}_{1\text{m}}$  is enhanced when mice are preinjected with paired  $\text{Ab}_{2\text{m}}$  and uptake blocked with self-paired  $\text{mAb}_{1\text{m}}$ . Paired enhancement of lung activity levels results in significantly decreased blood levels. The dashed line indicates non-specific lung activity levels of control  $^{125}\text{I-IgG}$  and dotted line indicates lung activity levels of probe with vehicle control PBS pre-injection. (B) Lung tissue activity of  $\text{Ab}_{1\text{m}}/^{125}\text{I-NC}$  (200  $\mu\text{g}$  NC per mouse) at 30 min p.i. is enhanced significantly with paired  $\text{Ab}_{2\text{m}}$  (30  $\mu\text{g}$  for 30 minutes) as compared to IgG pre-injection. Blood levels of  $\text{Ab}_{1\text{m}}/^{125}\text{I-NC}$  following paired Ab treatment is lower than blood in IgG pre-treated mice. Dashed line indicates lung uptake of non-specific IgG/ $^{125}\text{I-NC}$  and dotted line is  $\text{Ab}_{1\text{m}}/^{125}\text{I-NC}$  lung uptake blocked with  $\text{Ab}_{1\text{m}}$  pretreatment. Data represented as mean  $\pm$  SE (n = 5 mice per group). \*,  $P < 0.05$ , \*\*\*,  $P < 0.001$ .

## REFERENCES

1. Chacko, A. M.; Nayak, M.; Greineder, C. F.; Delisser, H. M.; Muzykantov, V. R. Collaborative enhancement of antibody binding to distinct PECAM-1 epitopes modulates endothelial targeting. *PLoS One* **2012**, *7*, e34958.
